# Supplementary material for: Transfer of cells with uptaken nanocomposite, magnetite-nanoparticle functionalized capsules with electromagnetic tweezers
Source: Royal Society of Chemistry journal article supplement (doi:10.1039/c8bm00479j), 2018-01-01
Supplement: c8bm00479j1.pdf [file c8bm00479j1.pdf]

### Supporting information

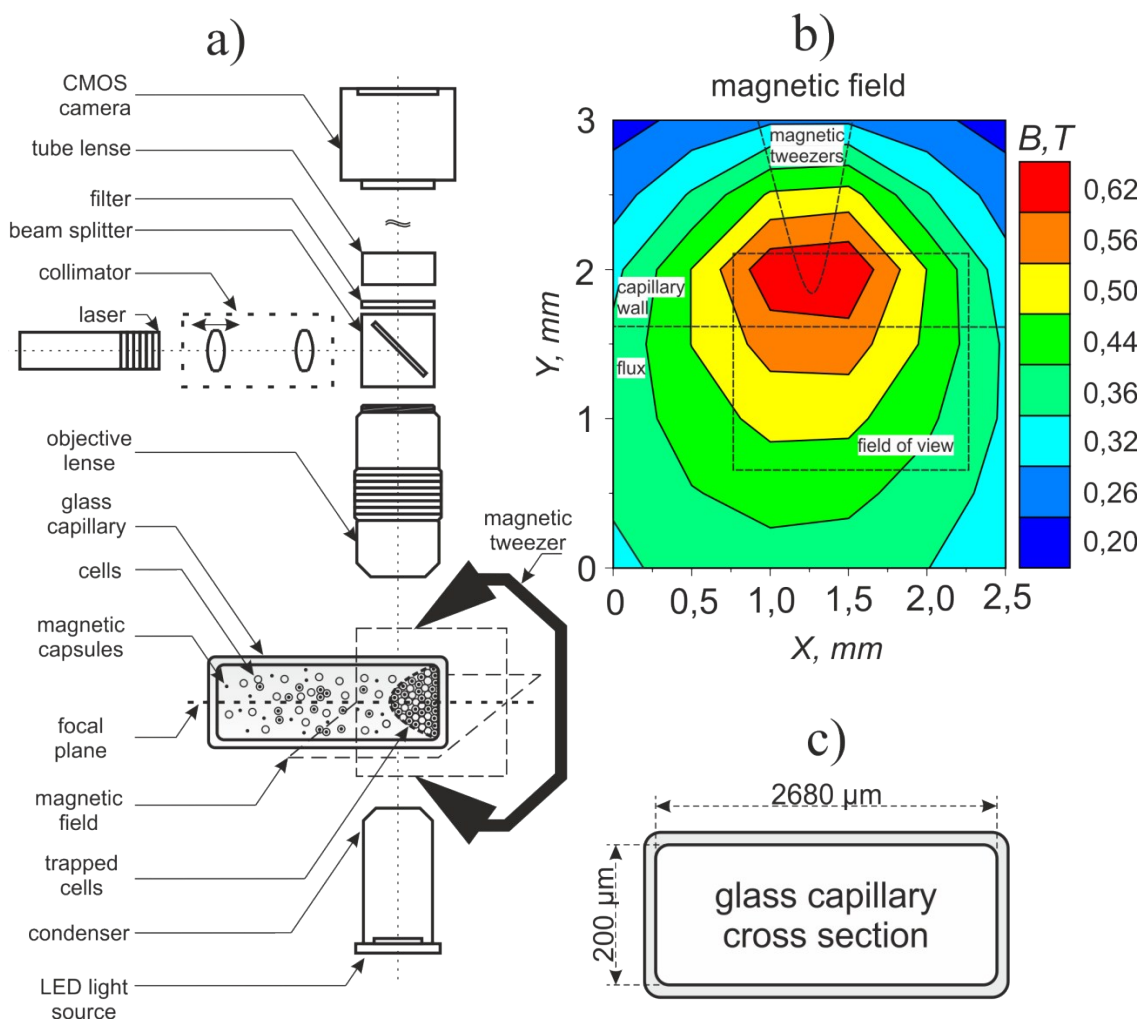

Fig S1 (A) Experimental arrangement; (B) magnetic field distribution in respect of field of view; (C) glass capillary dimension.

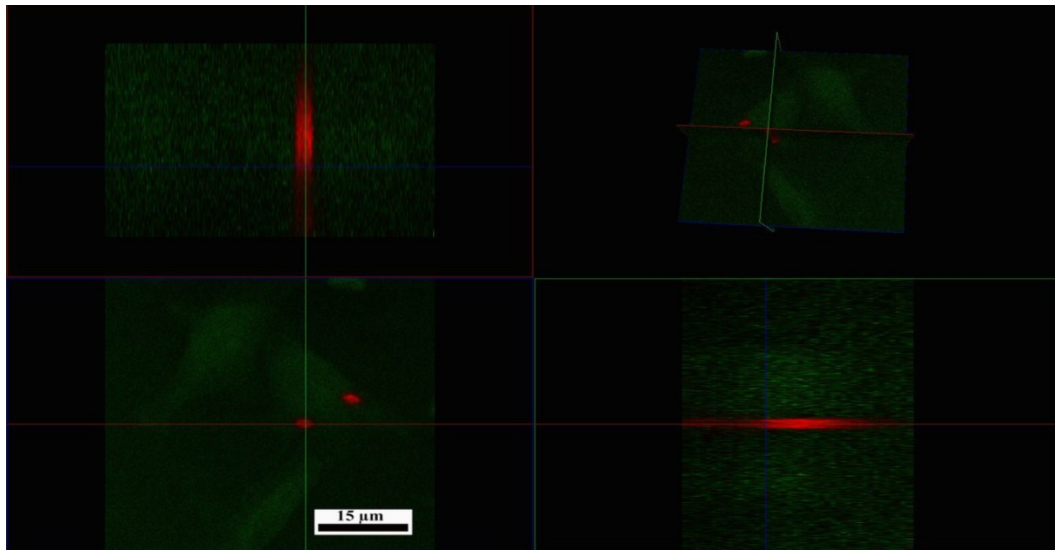

Fig S2 3-D reconstruction of MA-104 (dye calcein) with magnetic capsules inside (dye TRITC) by confocal microscopy in capillary (the fourth day after the experiment)
